# Supplementary material for: A Brain-Targeted Approach to Ameliorate Memory Disorders in a Sporadic Alzheimer’s Disease Mouse Model via Intranasal Luteolin-Loaded Nanobilosomes
Source: MDPI journal article supplement (doi:10.3390/pharmaceutics14030576), 2022-03-05
Supplement: s1 [file s1]

# Supplementary Materials: A Brain-Targeted Approach to Ameliorate Memory Disorders in a Sporadic Alzheimer's Disease Mouse Model via Intranasal Luteolin-Loaded Nanobilosomes

Manal A Elsheikh, Yasmin A. El-Feky, Majid Mohammad Al-Sawahli, Merhan E. Ali, Ahmed M. Fayez and Haidy Abbas

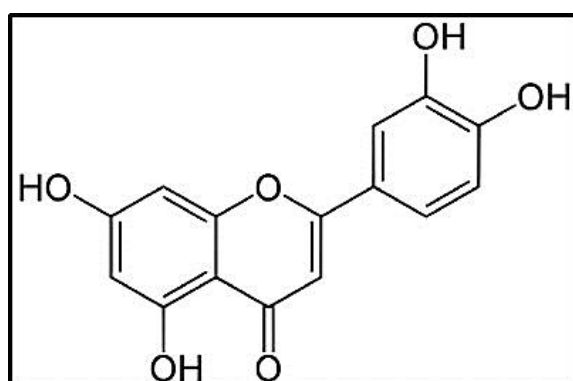

**Figure S1.** Chemical structure of luteolin.
